# Supplementary material
Source: MDPI journal article supplement (https://www.mdpi.com/2075-163X/12/2/122)
Supplement: s1 [file s1]

# Data Integration of Critical Elements from Mine Waste in Mexico, Chile and Australia

Denys Villa Gomez <sup>1,\*</sup>, Enrique Sáez Salgado <sup>2</sup>, Olivia Mejías <sup>2</sup>, Aurora Margarita Pat-Espadas <sup>3</sup>, Laura Alejandra Pinedo Torres <sup>4</sup>, Laura Jackson <sup>2</sup> and Anita Parbhakar-Fox <sup>2</sup>

<sup>1</sup> School of Civil Engineering, The University of Queensland, 4072 Brisbane, Australia

<sup>2</sup> W.H. Bryan Mining & Geology Research Centre, Sustainable Minerals Institute, University of Queensland, 4068 Brisbane, Australia; e.saezsalgado@uq.edu.au (E.S.S.); o.mejiasgonzalez@uq.edu.au (O.M.); laura.jackson@uq.edu.au (L.J.); a.parbhakarfox@uq.edu.au (A.P.-F.)

<sup>3</sup> CONACYT-UNAM Instituto de Geología, Estación Regional del Noroeste, Avenida Luis D. Colosio esquina Madrid, 83000 Hermosillo, Mexico; paespadas@geologia.unam.mx

<sup>4</sup> Unidad Profesional Interdisciplinaria de Ingeniería Campus Zacatecas, Instituto Politécnico Nacional Zacatecas, 98160 Zacatecas, Mexico; lauraalejandrapinedotorres@yahoo.com.mx

\* Correspondence: d.villagomez@uq.edu.au

## Supplementary Material

Table S1. Collected data from Mexico. In excel file.

Table S2. Collected data from Chile. In excel file.

**Table S3.** Characteristics of Australian tailings sites used in this study.

| Site Name                | Location                                                                                                                  | Mineralogy                                     | Number of Samples Collected | Depth of Samples Collected | Site Owner                             |
|--------------------------|---------------------------------------------------------------------------------------------------------------------------|------------------------------------------------|-----------------------------|----------------------------|----------------------------------------|
| <b>Capri-corn Copper</b> | NW Queensland situated in the western fold belt of the Mt. Isa Inlier.                                                    | Cobalt<br>Copper                               | 136                         | Surface to 10m             | (29Metals, 2021)                       |
| <b>Wolfram Camp</b>      | 90 Km West from Cairns, North east Queensland.                                                                            | Tungsten<br>Molybdenum                         | 57                          |                            | (Queensland Government, 2021)          |
| <b>Mount Garnet</b>      | 161 km SW of Cairns in northeast Queensland                                                                               | Zinc<br>Lead<br>Copper<br>Gold<br>Silver       | 72                          | Surface to 5.5m            | (Consolidated Tin Mines Lmted. , 2021) |
| <b>Heberton</b>          | 75 km west of Innisfail and 64km southwest of Cairns. It is situated on the Wild River, a tributary of the Herbert River. | Tin Lode<br>Tungsten<br>Copper<br>Zinc<br>Gold | 62                          | Surface to 1.2m            | (Queensland Government, 2016)          |
| <b>Rocklands</b>         | 15 km northwest of Cloncurry, Central Queensland                                                                          | Copper<br>Cobalt<br>Gold<br>Iron<br>Magnetite  | 60                          | Surface to 6m              | (Mining Technology, 2019)              |
| <b>Horn Island</b>       | Part of the Torres Strait Island group at the tip of Cape                                                                 | Gold                                           | 24                          | Surface to 5m              | (Queensland Government, 2021)          |

York Peninsula, Australia's  
northernmost point.  
1,030km North of Cairns.

**Table S4.** Detection Limits for the Australian Tailings Samples used in this study.

| ME-MS61 (0.25g) | Ana-lyte    | Ag<br>ppm | Al<br>ppm | As<br>ppm | Ba<br>ppm | Be<br>ppm | Bi<br>ppm | Ca<br>ppm | Cd<br>ppm | Ce<br>ppm | Co<br>ppm | Cr<br>ppm | Cs<br>ppm | Cu<br>ppm | Fe<br>pct | Ga        | Ge<br>ppm |
|-----------------|-------------|-----------|-----------|-----------|-----------|-----------|-----------|-----------|-----------|-----------|-----------|-----------|-----------|-----------|-----------|-----------|-----------|
|                 | Lower limit | 0.01      | 0.01      | 0.2       | 10        | 0.05      | 0.01      | 0.01      | 0.02      | 0.01      | 0.1       | 1         | 0.05      | 0.2       | 0.01      | 0.05      | 0.05      |
|                 | Upper Limit | 100       | 50        | 10,000    | 10,000    | 1000      | 10,000    | 50        | 1000      | 500       | 10,000    | 10,000    | 500       | 10,000    | 50        | 10,000    | 500       |
|                 | Ana-lyte    | Hf<br>ppm | In<br>ppm | K<br>ppm  | La<br>ppm | Li<br>ppm | Mg<br>pct | Mn<br>ppm | Mo<br>ppm | Na<br>ppm | Nb<br>ppm | Ni<br>ppm | P<br>ppm  | Pb<br>ppm | Rb<br>ppm | Re<br>ppm | S<br>pct  |
|                 | Lower limit | 0.1       | 0.005     | 0.01      | 0.5       | 0.2       | 0.01      | 5         | 0.05      | 0.01      | 0.1       | 0.2       | 10        | 0.5       | 0.1       | 0.002     | 0.01      |
|                 | Upper Limit | 500       | 500       | 10        | 10,000    | 10,000    | 50        | 10,000    | 10,000    | 10        | 500       | 10,000    | 10,000    | 10,000    | 10,000    | 50        | 10        |
|                 | Ana-lyte    | Sb<br>ppm | Sc<br>ppm | Se<br>ppm | Sn<br>ppm | Sr<br>ppm | Ta<br>ppm | Te<br>ppm | Th<br>ppm | Ti<br>pct | Tl<br>ppm | U<br>ppm  | V<br>ppm  | W<br>ppm  | Y<br>ppm  | Zn<br>ppm | Zr<br>ppm |
|                 | Lower limit | 0.05      | 0.1       | 1         | 0.2       | 0.2       | 0.05      | 0.05      | 0.01      | 0.005     | 0.02      | 0.1       | 1         | 0.1       | 0.1       | 2         | 0.5       |
|                 | Upper Limit | 10,000    | 10,000    | 1000      | 500       | 10,000    | 100       | 500       | 10,000    | 10        | 10,000    | 10,000    | 10,000    | 10,000    | 500       | 10,000    | 500       |
